# Supplementary material for: Topotactic conversion of layered silicate RUB-15 to silica sodalite through interlayer condensation in N-methylformamide
Source: Royal Society of Chemistry journal article supplement (doi:10.1039/c7dt01287j), 2017-01-01
Supplement: c7dt01287j1.pdf [file c7dt01287j1.pdf]

## Electronic Supplementary Information

### Topotactic Conversion of Layered Silicate RUB-15 to Silica Sodalite through Interlayer Condensation in *N*-Methylformamide

Masakazu Koike,<sup>‡a</sup> Yusuke Asakura,<sup>‡a†</sup> Megumi Sugihara,<sup>a</sup> Yoshiyuki Kuroda,<sup>b¶</sup> Hidehiro Tsuzura,<sup>a</sup>  
Hiroaki Wada,<sup>a</sup> Atsushi Shimojima,<sup>a</sup> Kazuyuki Kuroda<sup>\*a,c</sup>

<sup>‡</sup> These authors equally contributed to this work.

<sup>a</sup> Department of Applied Chemistry, Faculty of Science and Engineering, Waseda University, 3-4-1 Ohkubo, Shinjuku-ku, Tokyo 169-8555, Japan.

<sup>b</sup> Waseda Institute for Advanced Study, Waseda University, 1-6-1 Nishiwaseda, Shinjuku-ku, Tokyo 169-8050, Japan.

<sup>c</sup> Kagami Memorial Research Institute for Materials Science and Technology, Waseda University, Nishiwaseda-2, Shinjuku-ku, Tokyo 169-0051, Japan.

<sup>†</sup> Present address: Institute of Multidisciplinary Research for Advanced Materials (IMRAM), Tohoku University, 2-1-1 Katahira, Aoba-ku, Sendai 980-0011, Japan.

<sup>¶</sup> Present address: Green Hydrogen Research Center, Yokohama National University, 79-5 Tokiwadai, Hodogaya-ku, Yokohama 240-8501, Japan.

#### Contents

Figure S1. SEM images of (a) RUB-15, (b) H-RUB-15, (c) AcRUB-15, (d) NMF(rt)-Ac-RUB-15, (e) NMF(180rf)-Ac-RUB-15, (f) NMF(180rf)-H-RUB-15, (g) cal-Ac-RUB-15, (h) cal- NMF(rt)-Ac-RUB-15, (i) cal- NMF(180rf)-Ac-RUB-15, and (j) cal-NMF(180rf)-H-RUB-15.

Figure S2. TG-DTA curves of RUB-15.

Figure S3. <sup>13</sup>C CP/MAS NMR spectra of (a) RUB-15, (b) Ac-RUB-15, (c) NMF(rt)-Ac-RUB-15, (d) NMF(180rf)-Ac-RUB-15, and (e) cal-NMF(180rf)-Ac-RUB-15.

Figure S4. TEM image of NMF(180rf)-Ac-RUB-15 and the ED patterns of the selected areas of (a) and (b) indicated in the TEM image with circular white dots.

Figure S5. TEM image of cal-NMF(180rf)-Ac-RUB-15 and the ED patterns of the selected areas of (a) and (b) indicated in the TEM image with circular white dots.

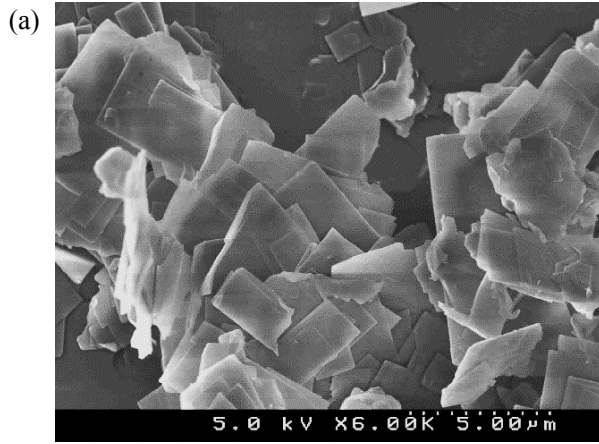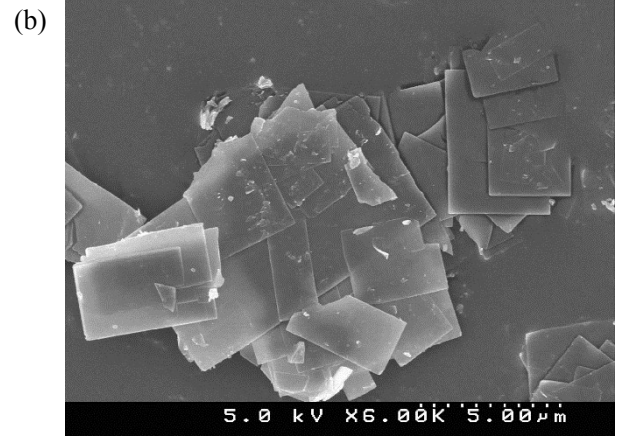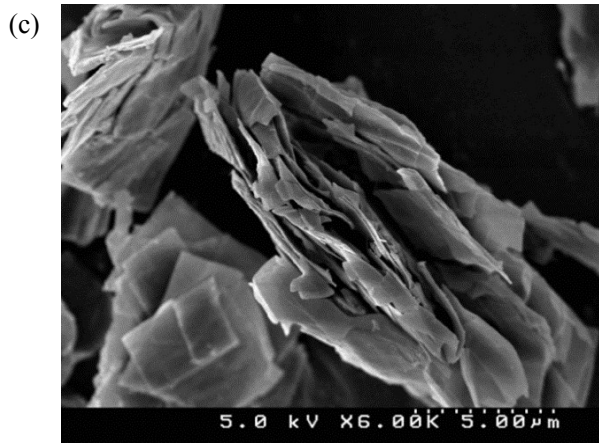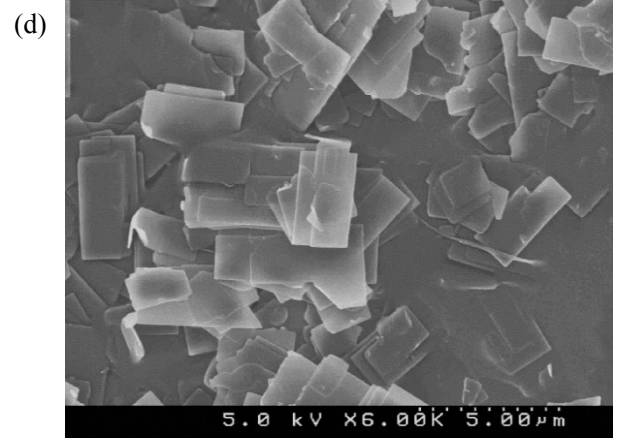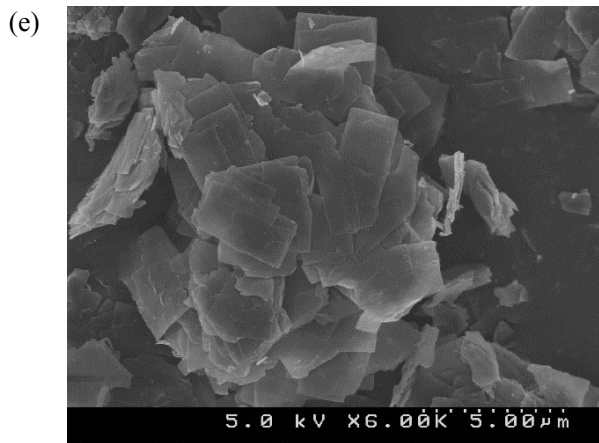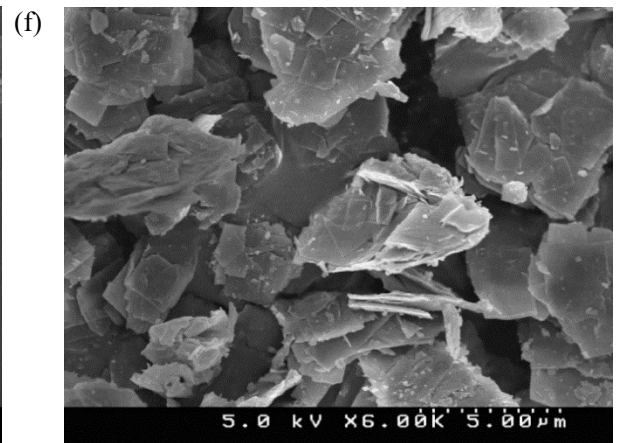

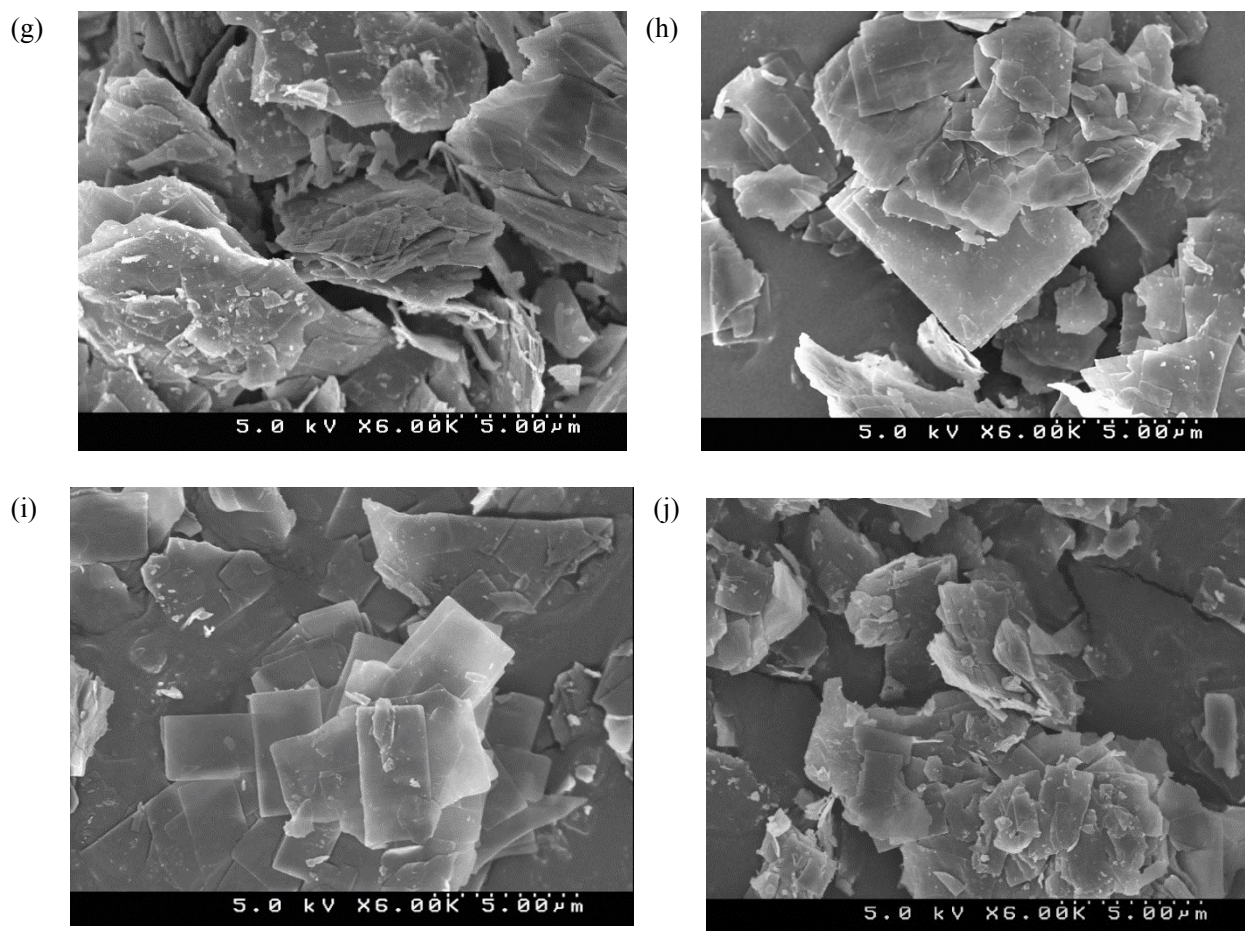

Figure S1. SEM images of (a) RUB-15, (b) H-RUB-15, (c) AcRUB-15, (d) NMF(rt)-Ac-RUB-15, (e) NMF(180rf)-Ac-RUB-15, (f) NMF(180rf)-H-RUB-15, (g) cal-Ac-RUB-15, (h) cal-NMF(rt)-Ac-RUB-15, (i) cal-NMF(180rf)-Ac-RUB-15, and (j) cal-NMF(180rf)-H-RUB-15.

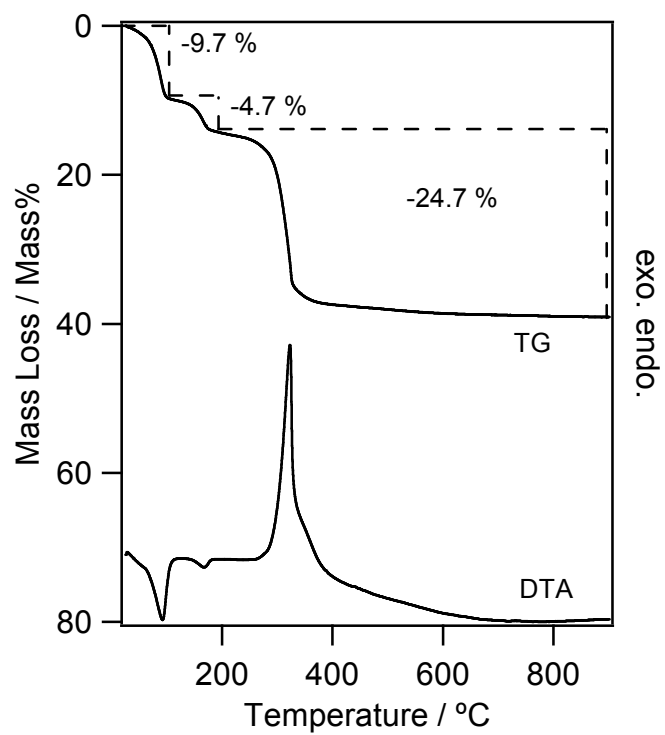

Figure S2. TG-DTA curves of RUB-15.

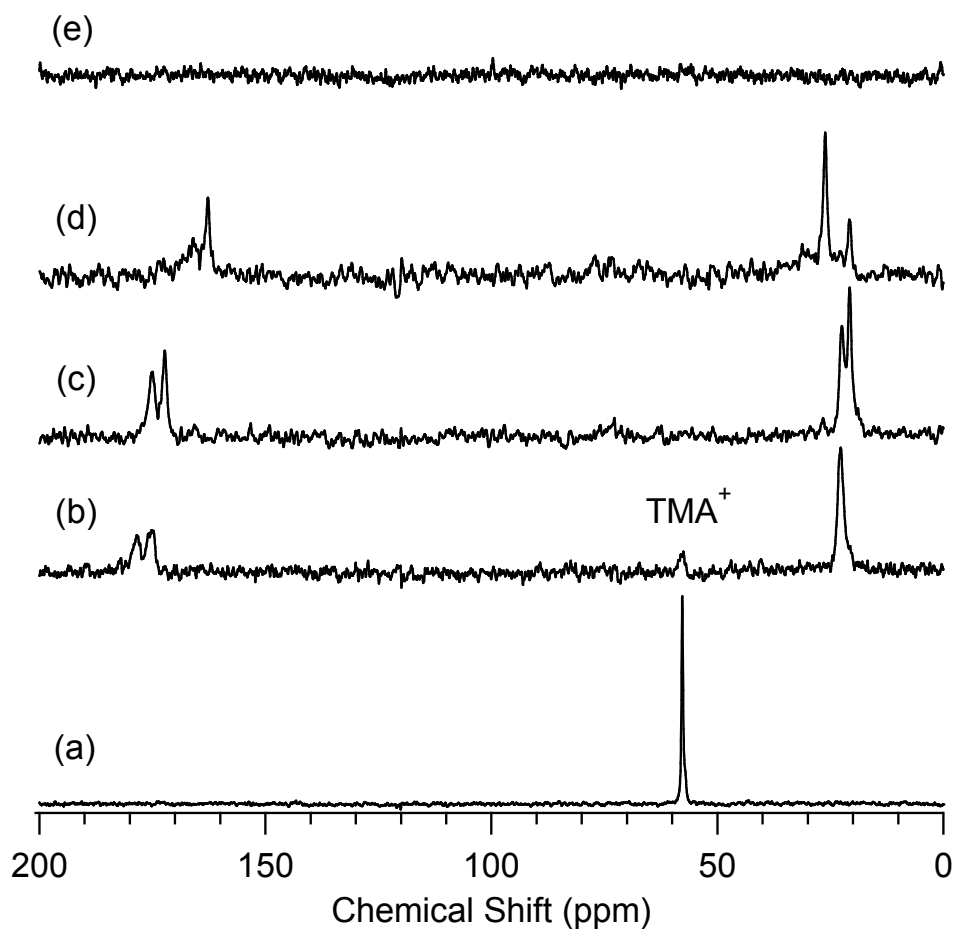

Figure S3.  $^{13}\text{C}$  CP/MAS NMR spectra of (a) RUB-15, (b) Ac-RUB-15, (c) NMF(rt)-Ac-RUB-15, (d) NMF(180rf)-Ac-RUB-15, and (e) cal-NMF(180rf)-Ac-RUB-15.

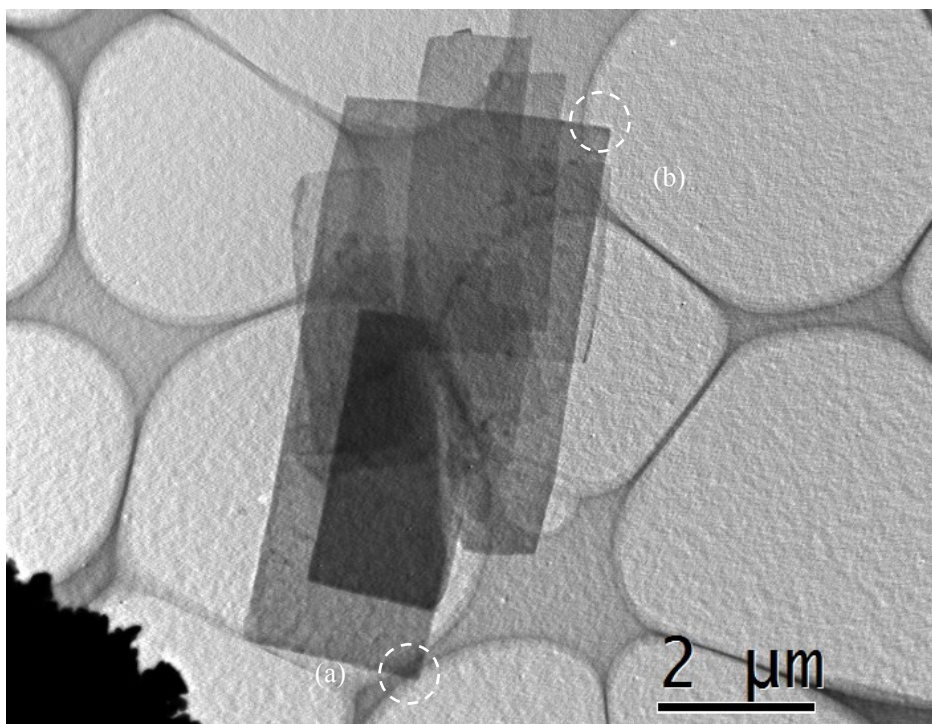

[110]

(a)

(b)

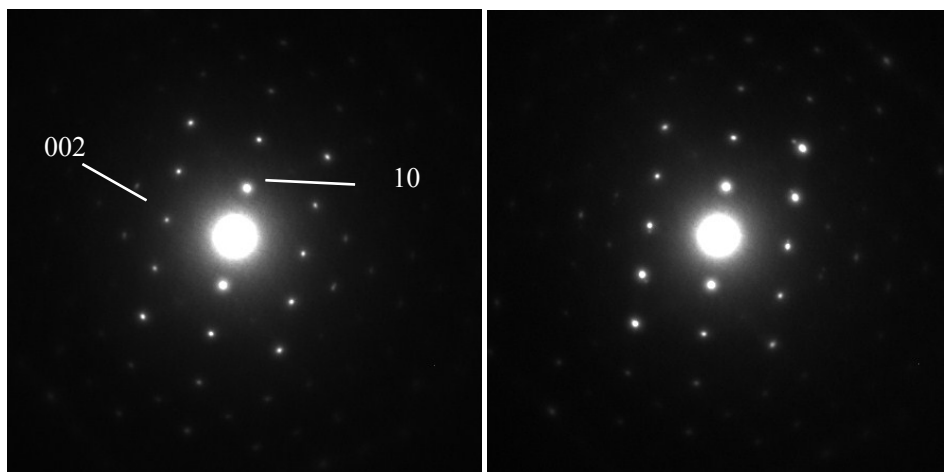

Figure S4. TEM image of NMF(180rf)-Ac-RUB-15 and the ED patterns of the selected areas of (a) and (b) indicated in the TEM image with circular white dots.

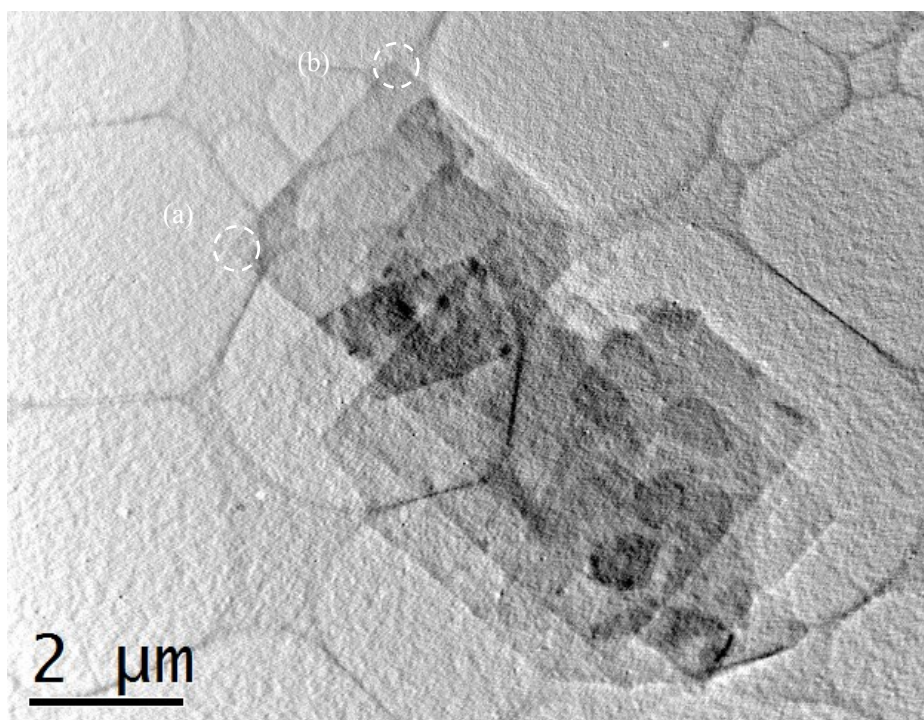

[110]

(a)

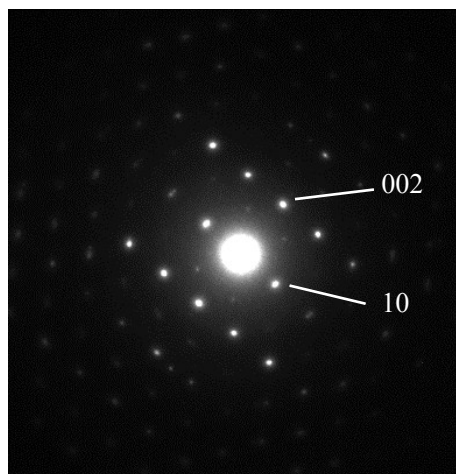

(b)

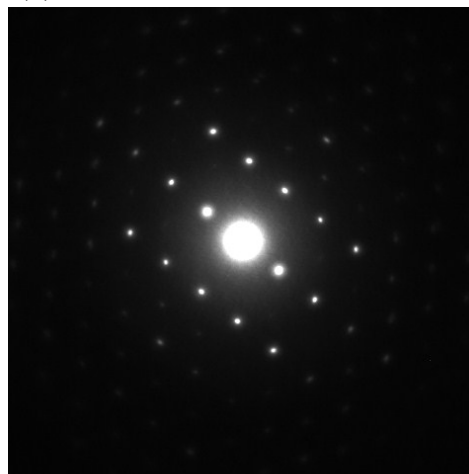

Figure S5. TEM image of cal-NMF(180rf)-Ac-RUB-15 and the ED patterns of the selected areas of (a) and (b) indicated in the TEM image with circular white dots.
